# Supplementary material for: Comparison of Prevalence, Awareness, Treatment, and Control of Cardiovascular Risk Factors in China and the United States
Source: PubMed Central journal article supplement — J Am Heart Assoc. 2018 Jan 26;7(3):e007462. doi: 10.1161/JAHA.117.007462 (PMC5850247; doi:10.1161/jaha.117.007462), 2018-01-26

## SUPPLEMENTAL MATERIAL

Figure S1. Construction of the study populations in China and the US in 2011-2012

### China

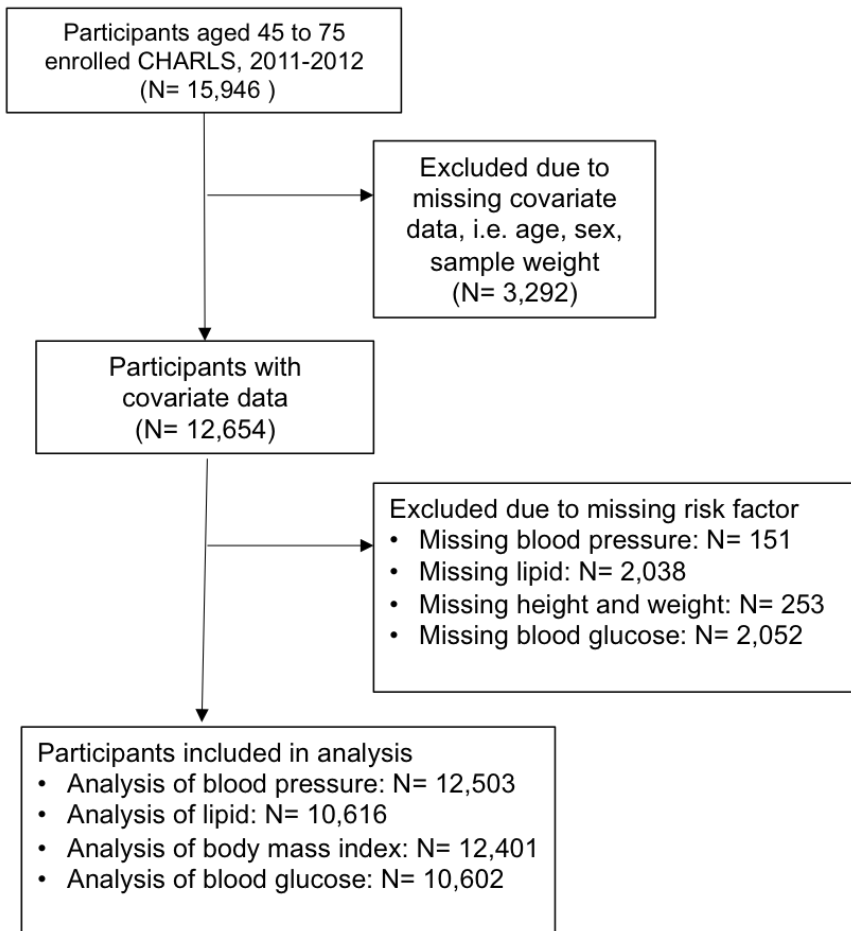

### US

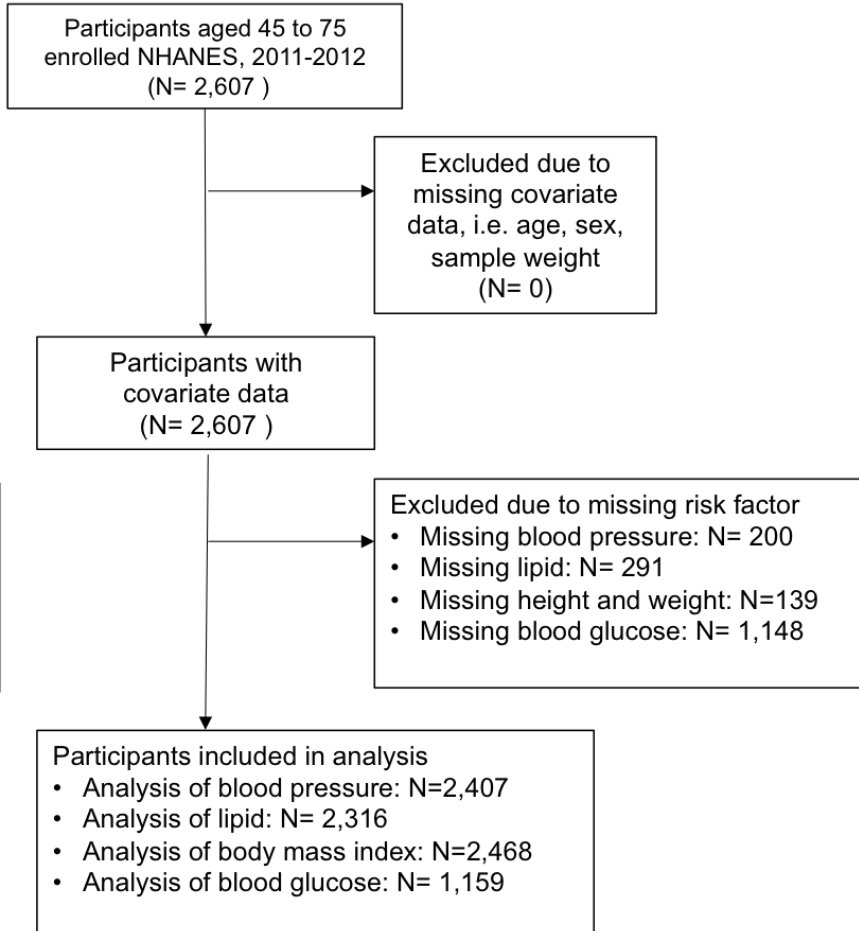

Supplement: JAH3-7-e007462-s001.pdf [file JAH3-7-e007462-s001.pdf]
